# Supplementary material
Source: PubMed Central journal article supplement (PMC4707045)
Supplement: NIHMS733068-supplement-Suppl_Tables_1-6.pdf [file NIHMS733068-supplement-Suppl_Tables_1-6.pdf]

**Supplemental Table 1:**

Downregulated mammary gland genes in isolated mice at 15 weeks as identified using RMA (n = 296)

| Probe set    | Accession | Gene symbol   | Gene name                                                                | SAM score | FC   | pval    |
|--------------|-----------|---------------|--------------------------------------------------------------------------|-----------|------|---------|
| 1422180_a_at | NM_010781 | Mcpt6         | mast cell protease 6                                                     | -8.651    | 0.71 | 0.00002 |
| 1448730_at   | NM_007753 | Cpa3          | carboxypeptidase A3, mast cell                                           | -7.024    | 0.61 | 0.00002 |
| 1425967_a_at | BC026198  | Mcpt4         | mast cell protease 4                                                     | -6.881    | 0.60 | 0.00002 |
| 1456389_at   | BB244754  | Zeb2          | zinc finger E-box binding homeobox 2                                     | -5.889    | 0.78 | 0.00003 |
| 1416652_at   | NM_025711 | Aspn          | asporin                                                                  | -5.624    | 0.69 | 0.00003 |
| 1448823_at   | BC006640  | Cxcl12        | chemokine (C-X-C motif) ligand 12                                        | -5.412    | 0.64 | 0.00003 |
| 1451287_s_at | BC024599  | 2810003C17Rik | RIKEN cDNA 2810003C17 gene                                               | -5.310    | 0.72 | 0.00003 |
| 1428538_s_at | BI328146  | Rarres2       | retinoic acid receptor responder (tazarotene induced) 2                  | -4.754    | 0.67 | 0.00003 |
| 1448421_s_at | NM_025711 | Aspn          | asporin                                                                  | -4.746    | 0.69 | 0.00003 |
| 1423586_at   | AA500897  | Axl           | AXL receptor tyrosine kinase                                             | -4.709    | 0.73 | 0.00003 |
| 1427932_s_at | BI076834  | 1200016E24Rik | RIKEN cDNA 1200016E24 gene                                               | -4.659    | 0.73 | 0.00003 |
| 1435137_s_at | BB119177  | 1200016E24Rik | Mus musculus mVL30-1 retroelement mRNA sequence.                         | -4.636    | 0.76 | 0.00003 |
| 1453238_s_at | AU018141  | A130040M12Rik | Mus musculus mVL30-1 retroelement mRNA sequence.                         | -4.534    | 0.71 | 0.00004 |
| 1449109_at   | NM_007706 | Socs2         | suppressor of cytokine signaling 2                                       | -4.528    | 0.71 | 0.00004 |
| 1437401_at   | BG075165  | Igf1          | insulin-like growth factor 1                                             | -4.509    | 0.63 | 0.00004 |
| 1426978_at   | AW682368  | Klhl2         | kelch-like 2, Mayven (Drosophila)                                        | -4.491    | 0.57 | 0.00004 |
| 1437902_s_at | AV012073  | Rarres2       | retinoic acid receptor responder (tazarotene induced) 2                  | -4.450    | 0.70 | 0.00004 |
| 1416625_at   | NM_009776 | Serping1      | serine (or cysteine) peptidase inhibitor, clade G, member 1              | -4.405    | 0.75 | 0.00004 |
| 1423506_a_at | AV218841  | Nnat          | neuronatin                                                               | -4.401    | 0.31 | 0.00004 |
| 1451130_at   | AF353245  | 2010315L10Rik | RIKEN cDNA 2010315L10 gene                                               | -4.379    | 0.76 | 0.00005 |
| 1417788_at   | NM_011430 | Sncg          | synuclein, gamma                                                         | -4.329    | 0.52 | 0.00005 |
| 1428774_at   | AK020118  | Gpc6          | glypican 6                                                               | -4.311    | 0.78 | 0.00005 |
| 1423156_at   | AK008566  | Gnpat1        | glucosamine-phosphate N-acetyltransferase 1                              | -4.146    | 0.76 | 0.00006 |
| 1422527_at   | NM_010386 | H2-DMa        | histocompatibility 2, class II, locus DMA                                | -4.133    | 0.75 | 0.00006 |
| 1435290_x_at | BE688749  | H2-Aa         | histocompatibility 2, class II antigen A, alpha                          | -4.116    | 0.69 | 0.00006 |
| 1450876_at   | AI987976  | Cfh           | complement component factor h                                            | -4.105    | 0.64 | 0.00006 |
| 1419663_at   | BB542051  | Ogn           | osteoglycin                                                              | -4.082    | 0.68 | 0.00007 |
| 1454822_x_at | BB271021  | Apcdd1        | adenomatosis polyposis coli down-regulated 1                             | -4.078    | 0.61 | 0.00007 |
| 1438467_at   | AW494220  | Mgl2          | macrophage galactose N-acetyl-galactosamine specific lectin 2            | -4.062    | 0.75 | 0.00007 |
| 1452431_s_at | AF119253  | H2-Aa         | histocompatibility 2, class II antigen A, alpha                          | -4.039    | 0.65 | 0.00007 |
| 1435640_x_at | BE634869  | A130040M12Rik | RIKEN cDNA A130040M12 gene                                               | -4.035    | 0.71 | 0.00007 |
| 1419662_at   | BB542051  | Ogn           | osteoglycin                                                              | -3.976    | 0.71 | 0.00008 |
| 1451563_at   | AF396935  | Emr4          | EGF-like module containing, mucin-like, hormone receptor-like sequence 4 | -3.968    | 0.78 | 0.00008 |
| 1422703_at   | BF683028  | Gyk           | glycerol kinase                                                          | -3.964    | 0.71 | 0.00008 |
| 1438665_at   | BF456582  | Smpd3         | sphingomyelin phosphodiesterase 3, neutral                               | -3.962    | 0.80 | 0.00008 |
| 1424305_at   | BC006026  | Igj           | immunoglobulin joining chain                                             | -3.955    | 0.50 | 0.00008 |
| 1425477_x_at | M15848    | H2-Ab1        | histocompatibility 2, class II antigen A, beta 1                         | -3.882    | 0.63 | 0.00009 |
| 1452244_at   | AK018128  | 6330406I15Rik | RIKEN cDNA 6330406I15 gene                                               | -3.880    | 0.73 | 0.00009 |

|              |           |               |                                                                                       |        |      |         |
|--------------|-----------|---------------|---------------------------------------------------------------------------------------|--------|------|---------|
| 1449456_a_at | NM_010780 | Cma1          | chymase 1, mast cell                                                                  | -3.822 | 0.70 | 0.00010 |
| 1427202_at   | AV002340  | 4833442J19Rik | RIKEN cDNA 4833442J19 gene                                                            | -3.813 | 0.74 | 0.00011 |
| 1420703_at   | BM941868  | Csf2ra        | colony stimulating factor 2 receptor, alpha, low-affinity<br>(granulocyte-macrophage) | -3.779 | 0.77 | 0.00011 |
| 1451721_a_at | M15848    | H2-Ab1        | histocompatibility 2, class II antigen A, beta 1                                      | -3.720 | 0.66 | 0.00013 |
| 1426937_at   | AK018128  | 6330406I15Rik | RIKEN cDNA 6330406I15 gene                                                            | -3.705 | 0.71 | 0.00013 |
| 1425763_x_at | BC019425  | Igh-VJ558     | immunoglobulin heavy chain (J558 family)                                              | -3.701 | 0.70 | 0.00013 |
| 1452417_x_at | AV057155  | Igk-V28       | immunoglobulin kappa chain variable 28 (V28)                                          | -3.673 | 0.51 | 0.00014 |
| 1450649_at   | NM_025277 | Gng10         | guanine nucleotide binding protein (G protein), gamma 10                              | -3.668 | 0.74 | 0.00015 |
| 1420924_at   | M93954    | Timp2         | tissue inhibitor of metalloproteinase 2                                               | -3.650 | 0.70 | 0.00015 |
| 1422704_at   | BF683028  | Gyk           | glycerol kinase                                                                       | -3.643 | 0.70 | 0.00015 |
| 1415973_at   | AW546141  | Marcks        | myristoylated alanine rich protein kinase C substrate                                 | -3.636 | 0.79 | 0.00016 |
| 1448406_at   | BC010712  | Eid1          | EP300 interacting inhibitor of differentiation 1                                      | -3.618 | 0.73 | 0.00016 |
| 1434423_at   | BB138485  | Gulp1         | GULP, engulfment adaptor PTB domain containing 1                                      | -3.617 | 0.58 | 0.00016 |
| 1422412_x_at | NM_017388 | Ear3          | eosinophil-associated, ribonuclease A family, member 3                                | -3.605 | 0.45 | 0.00017 |
| 1426172_a_at | AF374470  | Cd209a        | CD209a antigen                                                                        | -3.575 | 0.70 | 0.00018 |
| 1458351_s_at | BB428573  | Klhl2         | kelch-like 2, Mayven (Drosophila)                                                     | -3.571 | 0.64 | 0.00018 |
| 1422411_s_at | NM_017388 | Ear3          | eosinophil-associated, ribonuclease A family, member 3                                | -3.543 | 0.46 | 0.00020 |
| 1423153_x_at | AI987976  | Cfh           | complement component factor h                                                         | -3.535 | 0.69 | 0.00020 |
| 1453839_a_at | AK004672  | Pi16          | peptidase inhibitor 16                                                                | -3.534 | 0.69 | 0.00020 |
| 1437939_s_at | BM237633  | Ctsc          | cathepsin C                                                                           | -3.533 | 0.72 | 0.00020 |
| 1448021_at   | AA266723  | 4930431B09Rik | RIKEN cDNA 4930431B09 gene                                                            | -3.497 | 0.73 | 0.00021 |
| 1417789_at   | NM_011330 | Ccl11         | small chemokine (C-C motif) ligand 11                                                 | -3.490 | 0.73 | 0.00022 |
| 1435710_at   | BB034038  | AI661384      | expressed sequence AI661384                                                           | -3.477 | 0.77 | 0.00022 |
| 1443783_x_at | AV086906  | H2-Aa         | histocompatibility 2, class II antigen A, alpha                                       | -3.454 | 0.68 | 0.00023 |
| 1419905_s_at | AV026552  | Hpgd          | hydroxyprostaglandin dehydrogenase 15 (NAD)                                           | -3.449 | 0.79 | 0.00023 |
| 1434413_at   | BG092677  | EST           | EST                                                                                   | -3.439 | 0.60 | 0.00024 |
| 1421187_at   | BB148128  | Ccr2          | chemokine (C-C motif) receptor 2                                                      | -3.439 | 0.72 | 0.00024 |
| 1436713_s_at | BM119226  | Gtl2          | GTL2, imprinted maternally expressed untranslated mRNA                                | -3.434 | 0.76 | 0.00024 |
| 1426015_s_at | AF302653  | Asph          | aspartate-beta-hydroxylase                                                            | -3.432 | 0.77 | 0.00024 |
| 1434881_s_at | BM220945  | Kctd12        | potassium channel tetramerisation domain containing 12                                | -3.423 | 0.77 | 0.00025 |
| 1418454_at   | NM_015776 | Mfap5         | microfibrillar associated protein 5                                                   | -3.410 | 0.76 | 0.00026 |
| 1424041_s_at | BC022123  | C1s           | complement component 1, s subcomponent                                                | -3.405 | 0.76 | 0.00026 |
| 1450648_s_at | NM_010379 | H2-Ab1        | histocompatibility 2, class II antigen A, beta 1                                      | -3.405 | 0.67 | 0.00026 |
| 1449533_at   | NM_026433 | Tmem100       | transmembrane protein 100                                                             | -3.391 | 0.68 | 0.00027 |
| 1437079_at   | AV334638  | Slc18a2       | solute carrier family 18 (vesicular monoamine), member 2                              | -3.369 | 0.73 | 0.00028 |
| 1435518_at   | BM246972  | Rap1b         | RAS related protein 1b                                                                | -3.367 | 0.73 | 0.00029 |
| 1450655_at   | AA214868  | Pten          | phosphatase and tensin homolog                                                        | -3.355 | 0.79 | 0.00029 |
| 1450792_at   | NM_011662 | Tyrobp        | TYRO protein tyrosine kinase binding protein                                          | -3.346 | 0.72 | 0.00030 |
| 1418507_s_at | NM_007706 | Socs2         | suppressor of cytokine signaling 2                                                    | -3.336 | 0.72 | 0.00031 |
| 1423158_at   | AK008566  | Gnpat1        | glucosamine-phosphate N-acetyltransferase 1                                           | -3.326 | 0.76 | 0.00031 |
| 1417111_at   | BB070019  | Man1a         | mannosidase 1, alpha                                                                  | -3.319 | 0.77 | 0.00032 |
| 1428909_at   | C85657    | A130040M12Rik | RIKEN cDNA A130040M12 gene                                                            | -3.298 | 0.73 | 0.00033 |

|              |           |               |                                                                               |        |      |         |
|--------------|-----------|---------------|-------------------------------------------------------------------------------|--------|------|---------|
| 1418697_at   | NM_009349 | Inmt          | indolethylamine N-methyltransferase                                           | -3.288 | 0.78 | 0.00034 |
| 1427660_x_at | BC013496  | Igk-V28       | immunoglobulin kappa chain variable 28 (V28)                                  | -3.270 | 0.53 | 0.00035 |
| 1419519_at   | NM_010512 | Igf1          | insulin-like growth factor 1                                                  | -3.267 | 0.66 | 0.00035 |
| 1456700_x_at | BB100920  | Marcks        | myristoylated alanine rich protein kinase C substrate                         | -3.248 | 0.79 | 0.00037 |
| 1418382_at   | BB770932  | Apcdd1        | adenomatosis polyposis coli down-regulated 1                                  | -3.246 | 0.64 | 0.00037 |
| 1453321_at   | AK003938  | Fndc1         | fibronectin type III domain containing 1                                      | -3.242 | 0.69 | 0.00037 |
| 1426183_a_at | AF440280  | Cd209d        | CD209d antigen                                                                | -3.241 | 0.69 | 0.00037 |
| 1427455_x_at | BI107286  | Igk-V28       | immunoglobulin kappa chain variable 28 (V28)                                  | -3.218 | 0.44 | 0.00040 |
| 1427053_at   | BC026627  | Abi3bp        | ABI gene family, member 3 (NESH) binding protein                              | -3.197 | 0.76 | 0.00042 |
| 1452031_at   | BB357585  | Slc1a3        | solute carrier family 1 (glial high affinity glutamate transporter), member 3 | -3.192 | 0.56 | 0.00042 |
| 1453771_at   | BF144687  | Gulp1         | GULP, engulfment adaptor PTB domain containing 1                              | -3.181 | 0.64 | 0.00043 |
| 1425829_a_at | AY029778  | Steap4        | STEAP family member 4                                                         | -3.179 | 0.64 | 0.00043 |
| 1419280_at   | AK012196  | Pip5k2a       | phosphatidylinositol-4-phosphate 5-kinase, type II, alpha                     | -3.169 | 0.73 | 0.00044 |
| 1438858_x_at | AV018723  | H2-Aa         | histocompatibility 2, class II antigen A, alpha                               | -3.150 | 0.79 | 0.00045 |
| 1456676_a_at | AV282911  | Pfkfb3        | 6-phosphofructo-2-kinase/fructose-2,6-biphosphatase 3                         | -3.146 | 0.75 | 0.00046 |
| 1460197_a_at | NM_054098 | Steap4        | STEAP family member 4                                                         | -3.143 | 0.69 | 0.00046 |
| 1452463_x_at | BG966217  | Igk-V28       | immunoglobulin kappa chain variable 28 (V28)                                  | -3.135 | 0.41 | 0.00047 |
| 1419194_s_at | NM_022024 | Gmfg          | glia maturation factor, gamma                                                 | -3.132 | 0.69 | 0.00048 |
| 1451527_at   | AF352788  | Pcolce2       | procollagen C-endopeptidase enhancer 2                                        | -3.130 | 0.61 | 0.00048 |
| 1417029_a_at | BB283676  | Trim2         | tripartite motif protein 2                                                    | -3.110 | 0.79 | 0.00050 |
| 1424099_at   | BC019664  | 2310016C16Rik | RIKEN cDNA 2310016C16 gene                                                    | -3.101 | 0.79 | 0.00051 |
| 1429381_x_at | AK007826  | Igh-VJ558     | immunoglobulin heavy chain (J558 family)                                      | -3.091 | 0.73 | 0.00052 |
| 1416697_at   | NM_010074 | Dpp4          | dipeptidylpeptidase 4                                                         | -3.085 | 0.67 | 0.00052 |
| 1423439_at   | AW106963  | Pck1          | phosphoenolpyruvate carboxykinase 1, cytosolic                                | -3.082 | 0.43 | 0.00053 |
| 1443906_at   | BE686894  | Cd55          | CD55 antigen                                                                  | -3.081 | 0.69 | 0.00053 |
| 1431385_a_at | AK002809  | Mbtps1        | membrane-bound transcription factor peptidase, site 1                         | -3.076 | 0.73 | 0.00054 |
| 1421854_at   | BF136544  | Fgl2          | fibrinogen-like protein 2                                                     | -3.068 | 0.74 | 0.00055 |
| 1433728_at   | AV367395  | BC038479      | cDNA sequence BC038479                                                        | -3.064 | 0.63 | 0.00055 |
| 1448291_at   | NM_013599 | Mmp9          | matrix metalloproteinase 9                                                    | -3.063 | 0.60 | 0.00056 |
| 1420620_a_at | NM_011883 | Rnf13         | ring finger protein 13                                                        | -3.062 | 0.80 | 0.00056 |
| 1417126_a_at | NM_026517 | Rpl22l1       | ribosomal protein L22 like 1                                                  | -3.058 | 0.79 | 0.00056 |
| 1419144_at   | NM_053094 | Cd163         | CD163 antigen                                                                 | -3.030 | 0.61 | 0.00061 |
| 1423261_at   | BB426248  | 1500015O10Rik | RIKEN cDNA 1500015O10 gene                                                    | -3.025 | 0.76 | 0.00062 |
| 1433727_at   | AV367395  | BC038479      | cDNA sequence BC038479                                                        | -3.019 | 0.63 | 0.00063 |
| 1427285_s_at | AW012617  | Malat1        | metastasis associated lung adenocarcinoma transcript 1 (non-coding RNA)       | -3.001 | 0.77 | 0.00066 |
| 1423756_s_at | BC019836  | Igfbp4        | insulin-like growth factor binding protein 4                                  | -3.001 | 0.80 | 0.00066 |
| 1449070_x_at | BB770932  | Apcdd1        | adenomatosis polyposis coli down-regulated 1                                  | -2.991 | 0.63 | 0.00068 |
| 1427054_s_at | BC026627  | Abi3bp        | ABI gene family, member 3 (NESH) binding protein                              | -2.980 | 0.75 | 0.00070 |
| 1436954_at   | C76969    | Wipf1         | WAS/WASL interacting protein family, member 1                                 | -2.963 | 0.75 | 0.00073 |
| 1416221_at   | BI452727  | Fstl1         | follistatin-like 1                                                            | -2.958 | 0.75 | 0.00074 |
| 1439617_s_at | AI265463  | Pck1          | phosphoenolpyruvate carboxykinase 1, cytosolic                                | -2.958 | 0.38 | 0.00074 |
| 1442019_at   | BB627097  | Rcvrn         | recoverin                                                                     | -2.957 | 0.69 | 0.00074 |

|              |           |               |                                                                                                       |        |      |         |
|--------------|-----------|---------------|-------------------------------------------------------------------------------------------------------|--------|------|---------|
| 1418383_at   | BB770932  | Apcdd1        | adenomatosis polyposis coli down-regulated 1                                                          | -2.952 | 0.58 | 0.00075 |
| 1426708_at   | BC003908  | Antxr2        | anthrax toxin receptor 2                                                                              | -2.950 | 0.75 | 0.00075 |
| 1420731_a_at | NM_007792 | Csrp2         | cysteine and glycine-rich protein 2                                                                   | -2.918 | 0.76 | 0.00082 |
| 1460423_x_at | U29768    | Igkv1-117     | immunoglobulin kappa chain variable 1-117                                                             | -2.914 | 0.58 | 0.00083 |
| 1449262_s_at | BB704337  | Lin7c         | lin-7 homolog C (C. elegans)                                                                          | -2.913 | 0.77 | 0.00083 |
| 1456398_at   | BB648848  | Tug1          | taurine upregulated gene 1                                                                            | -2.906 | 0.77 | 0.00085 |
| 1455795_at   | BM207218  | Dse           | dermatan sulfate epimerase                                                                            | -2.901 | 0.79 | 0.00086 |
| 1429775_a_at | AK009736  | Gpr137b       | G protein-coupled receptor 137B                                                                       | -2.898 | 0.80 | 0.00087 |
| 1449971_a_at | NM_026956 | Cd209f        | CD209f antigen                                                                                        | -2.898 | 0.73 | 0.00087 |
| 1421992_a_at | NM_010517 | Igfbp4        | insulin-like growth factor binding protein 4                                                          | -2.897 | 0.79 | 0.00087 |
| 1420398_at   | BB139986  | Rgs18         | regulator of G-protein signaling 18                                                                   | -2.893 | 0.73 | 0.00088 |
| 1417222_a_at | NM_133739 | Tmem123       | transmembrane protein 123                                                                             | -2.891 | 0.78 | 0.00088 |
| 1449015_at   | NM_020509 | Retnla        | resistin like alpha                                                                                   | -2.891 | 0.73 | 0.00088 |
| 1443749_x_at | BB085413  | Slc1a3        | solute carrier family 1 (glial high affinity glutamate transporter), member 3                         | -2.890 | 0.71 | 0.00089 |
| 1449298_a_at | NM_016744 | Pde1a         | phosphodiesterase 1A, calmodulin-dependent                                                            | -2.874 | 0.79 | 0.00093 |
| 1424186_at   | BG074158  | Ccdc80        | coiled-coil domain containing 80                                                                      | -2.874 | 0.79 | 0.00093 |
| 1425519_a_at | BC003476  | Cd74          | CD74 antigen (invariant polypeptide of major histocompatibility complex, class II antigen-associated) | -2.872 | 0.69 | 0.00093 |
| 1421653_a_at | NM_134051 | Igh-VJ558     | immunoglobulin heavy chain (J558 family)                                                              | -2.858 | 0.73 | 0.00096 |
| 1450231_a_at | BF137345  | Birc4         | baculoviral IAP repeat-containing 4                                                                   | -2.857 | 0.76 | 0.00097 |
| 1460049_s_at | BB392676  | 1500015O10Rik | RIKEN cDNA 1500015O10 gene                                                                            | -2.855 | 0.69 | 0.00097 |
| 1421321_a_at | NM_019671 | Net1          | neuroepithelial cell transforming gene 1                                                              | -2.837 | 0.77 | 0.00101 |
| 1439426_x_at | AV058500  | Lyzs          | lysozyme                                                                                              | -2.833 | 0.72 | 0.00103 |
| 1450084_s_at | NM_054102 | Ivns1abp      | influenza virus NS1A binding protein                                                                  | -2.832 | 0.76 | 0.00103 |
| 1416111_at   | NM_009856 | Cd83          | CD83 antigen                                                                                          | -2.822 | 0.70 | 0.00106 |
| 1451941_a_at | M14216    | Fcgr2b        | Fc receptor, IgG, low affinity IIb                                                                    | -2.820 | 0.71 | 0.00106 |
| 1451415_at   | BC016562  | 1810011O10Rik | RIKEN cDNA 1810011O10 gene                                                                            | -2.815 | 0.79 | 0.00108 |
| 1454157_a_at | AK004232  | Pla2g2d       | phospholipase A2, group IID                                                                           | -2.809 | 0.66 | 0.00111 |
| 1433639_at   | AW548096  | 5730593F17Rik | RIKEN cDNA 5730593F17 gene                                                                            | -2.808 | 0.76 | 0.00111 |
| 1424524_at   | BC021433  | 1200002N14Rik | RIKEN cDNA 1200002N14 gene                                                                            | -2.799 | 0.77 | 0.00114 |
| 1426341_at   | BB357585  | Slc1a3        | solute carrier family 1 (glial high affinity glutamate transporter), member 3                         | -2.786 | 0.62 | 0.00118 |
| 1425216_at   | AV370830  | Ffar2         | free fatty acid receptor 2                                                                            | -2.784 | 0.73 | 0.00119 |
| 1431645_a_at | AK013104  | Gdi2          | guanosine diphosphate (GDP) dissociation inhibitor 2                                                  | -2.782 | 0.75 | 0.00119 |
| 1452279_at   | BB800282  | Cfp           | complement factor properdin                                                                           | -2.778 | 0.77 | 0.00121 |
| 1442312_at   | BM229258  | Tb11xr1       | transducin (beta)-like 1X-linked receptor 1                                                           | -2.775 | 0.78 | 0.00122 |
| 1421394_a_at | BF137345  | Birc4         | baculoviral IAP repeat-containing 4                                                                   | -2.769 | 0.78 | 0.00124 |
| 1438556_a_at | BB224629  | Tmod3         | tropomodulin 3                                                                                        | -2.762 | 0.80 | 0.00127 |
| 1450822_at   | NM_013590 | Lyz           | lysozyme                                                                                              | -2.759 | 0.78 | 0.00129 |
| 1452071_at   | BE655147  | Slc4a4        | solute carrier family 4 (anion exchanger), member 4                                                   | -2.715 | 0.78 | 0.00144 |
| 1431606_a_at | AK012003  | Angel2        | angel homolog 2 (Drosophila)                                                                          | -2.710 | 0.80 | 0.00145 |
| 1428043_a_at | AB061276  | Cmah          | cytidine monophospho-N-acetylneuraminic acid hydroxylase                                              | -2.709 | 0.80 | 0.00146 |

|              |           |               |                                                             |        |      |         |
|--------------|-----------|---------------|-------------------------------------------------------------|--------|------|---------|
| 1432517_a_at | AK006371  | Nnmt          | nicotinamide N-methyltransferase                            | -2.698 | 0.56 | 0.00152 |
| 1416072_at   | NM_133654 | Cd34          | CD34 antigen                                                | -2.696 | 0.77 | 0.00152 |
| 1417714_x_at | NM_008218 | Hba-a1        | hemoglobin alpha, adult chain 1                             | -2.689 | 0.66 | 0.00155 |
| 1421991_a_at | NM_010517 | Igfbp4        | insulin-like growth factor binding protein 4                | -2.680 | 0.79 | 0.00160 |
| 1425832_a_at | AF301018  | Cxcr6         | chemokine (C-X-C motif) receptor 6                          | -2.673 | 0.74 | 0.00163 |
| 1449918_at   | NM_027343 | Cd209g        | CD209g antigen                                              | -2.669 | 0.70 | 0.00165 |
| 1417009_at   | NM_023143 | C1r           | complement component 1, r subcomponent                      | -2.667 | 0.79 | 0.00166 |
| 1436319_at   | BB751459  | Sulf1         | sulfatase 1                                                 | -2.665 | 0.77 | 0.00167 |
| 1434681_at   | BG069603  | 4932441K18Rik | RIKEN cDNA 4932441K18 gene                                  | -2.647 | 0.78 | 0.00175 |
| 1420664_s_at | NM_011171 | Procr         | protein C receptor, endothelial                             | -2.643 | 0.77 | 0.00178 |
| 1420011_s_at | C77390    | Xbp1          | X-box binding protein 1                                     | -2.637 | 0.80 | 0.00181 |
| 1419279_at   | AK012196  | Pip5k2a       | phosphatidylinositol-4-phosphate 5-kinase, type II, alpha   | -2.630 | 0.79 | 0.00184 |
| 1420699_at   | NM_020008 | Clec7a        | C-type lectin domain family 7, member a                     | -2.630 | 0.76 | 0.00184 |
| 1448259_at   | BI452727  | Fstl1         | follistatin-like 1                                          | -2.626 | 0.79 | 0.00187 |
| 1429693_at   | AK017619  | Dab2          | disabled homolog 2 (Drosophila)                             | -2.626 | 0.79 | 0.00187 |
| 1452014_a_at | AF440694  | Igf1          | insulin-like growth factor 1                                | -2.616 | 0.70 | 0.00194 |
| 1427301_at   | BE634960  | Cd48          | CD48 antigen                                                | -2.615 | 0.68 | 0.00195 |
| 1452007_at   | BC003764  | Sybl1         | synaptobrevin like 1                                        | -2.609 | 0.79 | 0.00197 |
| 1417426_at   | NM_011157 | Srgn          | serglycin                                                   | -2.605 | 0.74 | 0.00200 |
| 1448525_a_at | AK018668  | Bnip3l        | BCL2/adenovirus E1B interacting protein 3-like              | -2.603 | 0.78 | 0.00201 |
| 1451204_at   | BC016096  | Scara5        | scavenger receptor class A, member 5 (putative)             | -2.602 | 0.76 | 0.00202 |
| 1424179_at   | BC005565  | Plekhj1       | pleckstrin homology domain containing, family J member 1    | -2.597 | 0.75 | 0.00205 |
| 1419368_a_at | NM_019706 | Rnf138        | ring finger protein 138                                     | -2.595 | 0.79 | 0.00206 |
| 1418511_at   | NM_019759 | Dpt           | dermatopontin                                               | -2.592 | 0.74 | 0.00208 |
| 1416868_at   | BC027026  | Cdkn2c        | cyclin-dependent kinase inhibitor 2C (p18, inhibits CDK4)   | -2.590 | 0.79 | 0.00208 |
| 1448919_at   | NM_025422 | Cd302         | CD302 antigen                                               | -2.587 | 0.77 | 0.00211 |
| 1422708_at   | BB205102  | Pik3cg        | phosphoinositide-3-kinase, catalytic, gamma polypeptide     | -2.585 | 0.79 | 0.00212 |
| 1456080_a_at | BM239368  | Serinc3       | serine incorporator 3                                       | -2.579 | 0.76 | 0.00215 |
| 1433933_s_at | BB553107  | Slco2b1       | solute carrier organic anion transporter family, member 2b1 | -2.573 | 0.80 | 0.00218 |
| 1450241_a_at | NM_010161 | Evi2a         | ecotropic viral integration site 2a                         | -2.570 | 0.77 | 0.00221 |
| 1455688_at   | BB795075  | Ddr2          | discoidin domain receptor family, member 2                  | -2.567 | 0.76 | 0.00223 |
| 1429184_at   | BM243571  | Gvin1         | GTPase, very large interferon inducible 1                   | -2.561 | 0.70 | 0.00227 |
| 1454174_a_at | AK021190  | C330007P06Rik | RIKEN cDNA C330007P06 gene                                  | -2.557 | 0.77 | 0.00230 |
| 1433512_at   | BB138212  | Fli1          | Friend leukemia integration 1                               | -2.556 | 0.79 | 0.00231 |
| 1437417_s_at | BB493031  | Gpc6          | glypican 6                                                  | -2.556 | 0.79 | 0.00231 |
| 1423034_at   | AK004219  | Txn15         | thioredoxin-like 5                                          | -2.552 | 0.79 | 0.00233 |
| 1435477_s_at | BM224327  | Fcgr2b        | Fc receptor, IgG, low affinity IIb                          | -2.547 | 0.77 | 0.00237 |
| 1428046_a_at | BC028506  | Zfx           | zinc finger protein X-linked                                | -2.546 | 0.80 | 0.00237 |
| 1448417_at   | NM_013610 | Ninj1         | ninjurin 1                                                  | -2.543 | 0.80 | 0.00239 |
| 1438200_at   | BB065799  | Sulf1         | sulfatase 1                                                 | -2.539 | 0.76 | 0.00241 |
| 1417851_at   | AF030636  | Cxcl13        | chemokine (C-X-C motif) ligand 13                           | -2.535 | 0.50 | 0.00244 |
| 1420899_at   | AW542340  | Rab18         | RAB18, member RAS oncogene family                           | -2.534 | 0.79 | 0.00245 |
| 1452191_at   | AK011112  | Prpc          | prolylcarboxypeptidase (angiotensinase C)                   | -2.533 | 0.79 | 0.00246 |

|              |           |               |                                                                               |        |      |         |
|--------------|-----------|---------------|-------------------------------------------------------------------------------|--------|------|---------|
| 1434067_at   | BE688410  | AI662270      | expressed sequence AI662270                                                   | -2.530 | 0.61 | 0.00248 |
| 1437772_s_at | BB225704  | Hmgcl         | 3-hydroxy-3-methylglutaryl-Coenzyme A lyase                                   | -2.526 | 0.78 | 0.00250 |
| 1423094_at   | AV156594  | Crbn          | cereblon                                                                      | -2.524 | 0.77 | 0.00251 |
| 1438069_a_at | BE446879  | Rbm5          | RNA binding motif protein 5                                                   | -2.523 | 0.79 | 0.00252 |
| 1417707_at   | NM_133898 | B230342M21Rik | RIKEN cDNA B230342M21 gene                                                    | -2.520 | 0.73 | 0.00256 |
| 1455364_a_at | AI414989  | Rps7          | ribosomal protein S7                                                          | -2.516 | 0.78 | 0.00258 |
| 1435519_at   | BM246972  | Rap1b         | RAS related protein 1b                                                        | -2.515 | 0.76 | 0.00259 |
| 1452619_a_at | AI463408  | Agbl3         | ATP/GTP binding protein-like 3                                                | -2.508 | 0.78 | 0.00264 |
| 1440125_at   | BG072966  | A530054K11Rik | RIKEN cDNA A530054K11 gene                                                    | -2.505 | 0.80 | 0.00267 |
| 1448527_at   | AV094856  | Pdcd10        | programmed cell death 10                                                      | -2.500 | 0.78 | 0.00270 |
| 1422761_at   | NM_030732 | Tbl1xr1       | transducin (beta)-like 1X-linked receptor 1                                   | -2.482 | 0.79 | 0.00286 |
| 1454806_at   | AV228737  | D12Ertd553e   | DNA segment, Chr 12, ERATO Doi 553, expressed                                 | -2.480 | 0.77 | 0.00287 |
| 1448891_at   | BC016551  | Msr2          | macrophage scavenger receptor 2                                               | -2.476 | 0.79 | 0.00291 |
| 1417184_s_at | BC027434  | Hbb-b2        | hemoglobin, beta adult minor chain                                            | -2.468 | 0.77 | 0.00298 |
| 1448620_at   | NM_010188 | Fcgr3         | Fc receptor, IgG, low affinity III                                            | -2.461 | 0.73 | 0.00304 |
| 1449670_x_at | AW546472  | Gpr137b       | G protein-coupled receptor 137B                                               | -2.456 | 0.79 | 0.00308 |
| 1434484_at   | AV006463  | 1100001G20Rik | RIKEN cDNA 1100001G20 gene                                                    | -2.453 | 0.67 | 0.00310 |
| 1418480_at   | NM_023785 | Ppbp          | pro-platelet basic protein                                                    | -2.452 | 0.76 | 0.00311 |
| 1426604_at   | BF714880  | Rnasel        | ribonuclease L (2', 5'-oligoisoadenylylate synthetase-dependent)              | -2.444 | 0.75 | 0.00319 |
| 1422978_at   | NM_007807 | Cybb          | cytochrome b-245, beta polypeptide                                            | -2.424 | 0.79 | 0.00337 |
| 1434096_at   | BB283443  | Slc4a4        | solute carrier family 4 (anion exchanger), member 4                           | -2.421 | 0.76 | 0.00340 |
| 1426340_at   | BB357585  | Slc1a3        | solute carrier family 1 (glial high affinity glutamate transporter), member 3 | -2.409 | 0.64 | 0.00353 |
| 1421555_at   | NM_013462 | Adrb3         | adrenergic receptor, beta 3                                                   | -2.407 | 0.74 | 0.00355 |
| 1428361_x_at | AK011116  | Hba-a1        | hemoglobin alpha, adult chain 1                                               | -2.402 | 0.74 | 0.00359 |
| 1449466_at   | NM_011606 | Clec3b        | C-type lectin domain family 3, member b                                       | -2.397 | 0.73 | 0.00365 |
| 1448995_at   | NM_019932 | Cxcl4         | chemokine (C-X-C motif) ligand 4                                              | -2.396 | 0.78 | 0.00365 |
| 1450430_at   | NM_008625 | Mrc1          | mannose receptor, C type 1                                                    | -2.396 | 0.76 | 0.00366 |
| 1451174_at   | BC027411  | Lrrc33        | leucine rich repeat containing 33                                             | -2.390 | 0.80 | 0.00372 |
| 1455181_at   | BM228516  | Rasa2         | RAS p21 protein activator 2                                                   | -2.387 | 0.80 | 0.00376 |
| 1417346_at   | BG084230  | Pycard        | PYD and CARD domain containing                                                | -2.385 | 0.80 | 0.00378 |
| 1460242_at   | NM_010016 | Cd55          | CD55 antigen                                                                  | -2.374 | 0.69 | 0.00388 |
| 1459973_x_at | BB228059  | Dpp4          | dipeptidylpeptidase 4                                                         | -2.372 | 0.73 | 0.00390 |
| 1426083_a_at | L16846    | Btg1          | B-cell translocation gene 1, anti-proliferative                               | -2.372 | 0.79 | 0.00391 |
| 1429954_at   | AK014135  | Clec4a3       | C-type lectin domain family 4, member a3                                      | -2.366 | 0.74 | 0.00397 |
| 1439819_at   | BG070233  | AU015263      | expressed sequence AU015263                                                   | -2.360 | 0.79 | 0.00404 |
| 1448623_at   | NM_133739 | Tmem123       | transmembrane protein 123                                                     | -2.359 | 0.80 | 0.00405 |
| 1424927_at   | BC025083  | Glipr1        | GLI pathogenesis-related 1 (glioma)                                           | -2.356 | 0.75 | 0.00409 |
| 1449928_at   | NM_025975 | Dynlt3        | dynein light chain Tctex-type 3                                               | -2.352 | 0.76 | 0.00414 |
| 1449580_s_at | NM_010388 | H2-DMb2       | histocompatibility 2, class II, locus Mb2                                     | -2.343 | 0.79 | 0.00425 |
| 1452016_at   | BC026209  | Alox5ap       | arachidonate 5-lipoxygenase activating protein                                | -2.343 | 0.79 | 0.00426 |
| 1434955_at   | BB134696  | March1        | membrane-associated ring finger (C3HC4) 1                                     | -2.340 | 0.66 | 0.00430 |
| 1417932_at   | NM_008360 | Il18          | interleukin 18                                                                | -2.338 | 0.78 | 0.00431 |

|              |           |               |                                                                        |        |      |         |
|--------------|-----------|---------------|------------------------------------------------------------------------|--------|------|---------|
| 1417756_a_at | NM_019391 | Lsp1          | lymphocyte specific 1                                                  | -2.336 | 0.74 | 0.00434 |
| 1447909_s_at | AW122690  | 6720457D02Rik | RIKEN cDNA 6720457D02 gene                                             | -2.333 | 0.77 | 0.00438 |
| 1420502_at   | NM_009121 | Sat1          | spermidine/spermine N1-acetyl transferase 1                            | -2.327 | 0.77 | 0.00444 |
| 1427471_at   | BF782863  | Fbxl3         | F-box and leucine-rich repeat protein 3                                | -2.321 | 0.79 | 0.00453 |
| 1417069_a_at | BG228815  | Gmfb          | glia maturation factor, beta                                           | -2.312 | 0.77 | 0.00464 |
| 1418762_at   | NM_010016 | Cd55          | CD55 antigen                                                           | -2.311 | 0.74 | 0.00465 |
| 1419585_at   | BF168611  | Rp2h          | retinitis pigmentosa 2 homolog (human)                                 | -2.309 | 0.77 | 0.00467 |
| 1422470_at   | NM_009760 | Bnip3         | BCL2/adenovirus E1B interacting protein 1, NIP3                        | -2.308 | 0.79 | 0.00468 |
| 1453736_s_at | BG923812  | B230219D22Rik | RIKEN cDNA B230219D22 gene                                             | -2.307 | 0.79 | 0.00469 |
| 1452348_s_at | AI481797  | Irf205        | interferon activated gene 205                                          | -2.300 | 0.71 | 0.00481 |
| 1435959_at   | BM246535  | Arhgap15      | Rho GTPase activating protein 15                                       | -2.300 | 0.70 | 0.00482 |
| 1421073_a_at | NM_008965 | Ptger4        | prostaglandin E receptor 4 (subtype EP4)                               | -2.294 | 0.78 | 0.00490 |
| 1417239_at   | BC002162  | Cetn3         | centrin 3                                                              | -2.287 | 0.76 | 0.00503 |
| 1425407_s_at | BC006623  | Clec4a2       | C-type lectin domain family 4, member a2                               | -2.282 | 0.80 | 0.00509 |
| 1422748_at   | NM_015753 | Zeb2          | zinc finger E-box binding homeobox 2                                   | -2.276 | 0.79 | 0.00517 |
| 1448136_at   | BC003264  | Enpp2         | ectonucleotide pyrophosphatase/phosphodiesterase 2                     | -2.274 | 0.79 | 0.00521 |
| 1450417_a_at | BG070206  | Rps20         | ribosomal protein S20                                                  | -2.273 | 0.78 | 0.00523 |
| 1421855_at   | BF136544  | Fgl2          | fibrinogen-like protein 2                                              | -2.271 | 0.79 | 0.00526 |
| 1437064_at   | AV232123  | Ar            | androgen receptor                                                      | -2.270 | 0.80 | 0.00527 |
| 1422542_at   | NM_011823 | Gpr34         | G protein-coupled receptor 34                                          | -2.267 | 0.71 | 0.00531 |
| 1430074_x_at | AI607344  | 8430426H19Rik | RIKEN cDNA 8430426H19 gene                                             | -2.260 | 0.77 | 0.00544 |
| 1438411_at   | BB009113  | Gpr109a       | G protein-coupled receptor 109A                                        | -2.257 | 0.61 | 0.00549 |
| 1444051_at   | AA215046  | 5830405N20Rik | RIKEN cDNA 5830405N20 gene                                             | -2.252 | 0.78 | 0.00557 |
| 1425701_a_at | AF350047  | Rgs3          | regulator of G-protein signaling 3                                     | -2.250 | 0.79 | 0.00561 |
| 1420867_at   | BB609648  | Tmed2         | transmembrane emp24 domain trafficking protein 2                       | -2.247 | 0.78 | 0.00565 |
| 1436996_x_at | AV066625  | Lyz           | lysozyme                                                               | -2.242 | 0.77 | 0.00575 |
| 1447926_at   | BB811124  | Arl5a         | ADP-ribosylation factor-like 5A                                        | -2.216 | 0.79 | 0.00619 |
| 1423593_a_at | AK004947  | Csf1r         | colony stimulating factor 1 receptor                                   | -2.211 | 0.79 | 0.00629 |
| 1427262_at   | L04961    | Xist          | inactive X specific transcripts                                        | -2.210 | 0.80 | 0.00631 |
| 1430332_a_at | AK002832  | Gusb          | glucuronidase, beta                                                    | -2.203 | 0.80 | 0.00641 |
| 1423547_at   | AW208566  | Lyzs          | lysozyme                                                               | -2.196 | 0.75 | 0.00654 |
| 1419073_at   | NM_019790 | Tmeff2        | transmembrane protein with EGF-like and two follistatin-like domains 2 | -2.185 | 0.71 | 0.00677 |
| 1421184_a_at | NM_027334 | Mettl7a       | methyltransferase like 7A                                              | -2.179 | 0.76 | 0.00689 |
| 1449404_at   | AK012196  | Pip5k2a       | phosphatidylinositol-4-phosphate 5-kinase, type II, alpha              | -2.178 | 0.80 | 0.00691 |
| 1429379_at   | AV124537  | Xlkd1         | extra cellular link domain-containing 1                                | -2.173 | 0.62 | 0.00702 |
| 1424187_at   | BG074158  | Ccdc80        | coiled-coil domain containing 80                                       | -2.172 | 0.77 | 0.00703 |
| 1425797_a_at | U36776    | Syk           | spleen tyrosine kinase                                                 | -2.165 | 0.80 | 0.00720 |
| 1426649_at   | BM114154  | Tmeff1        | transmembrane protein with EGF-like and two follistatin-like domains 1 | -2.164 | 0.79 | 0.00722 |
| 1422812_at   | NM_030712 | Cxcr6         | chemokine (C-X-C motif) receptor 6                                     | -2.163 | 0.77 | 0.00723 |
| 1417130_s_at | NM_020581 | Angptl4       | angiopoietin-like 4                                                    | -2.161 | 0.79 | 0.00726 |
| 1452349_x_at | AI481797  | Irf205        | interferon activated gene 205                                          | -2.150 | 0.78 | 0.00750 |
| 1419532_at   | NM_010555 | Il1r2         | interleukin 1 receptor, type II                                        | -2.150 | 0.73 | 0.00751 |

|              |           |          |                                                     |        |      |         |
|--------------|-----------|----------|-----------------------------------------------------|--------|------|---------|
| 1436172_at   | BQ175154  | Samd9l   | sterile alpha motif domain containing 9-like        | -2.147 | 0.78 | 0.00757 |
| 1449265_at   | BC008152  | Casp1    | caspase 1                                           | -2.145 | 0.80 | 0.00761 |
| 1433963_a_at | BG066664  | BC032204 | cDNA sequence BC032204                              | -2.136 | 0.64 | 0.00782 |
| 1415905_at   | NM_009042 | Reg1     | regenerating islet-derived 1                        | -2.125 | 0.78 | 0.00808 |
| 1426398_at   | BB796558  | Ube2w    | ubiquitin-conjugating enzyme E2W (putative)         | -2.119 | 0.80 | 0.00823 |
| 1460437_at   | AK010908  | Pscd4    | pleckstrin homology, Sec7 and coiled/coil domains 4 | -2.116 | 0.76 | 0.00829 |
| 1455918_at   | BB224790  | Adrb3    | adrenergic receptor, beta 3                         | -2.106 | 0.77 | 0.00854 |

---



**Supplemental Table 2:**

Upregulated mammary gland genes in isolated mice at 15 weeks as identified using RMA (n = 68)

| Probe set    | Accession | Gene symbol   | Gene name                                                                 | SAM score | FC   | pval    |
|--------------|-----------|---------------|---------------------------------------------------------------------------|-----------|------|---------|
| 1419358_at   | NM_030889 | Sorcs2        | sortilin-related VPS10 domain containing receptor 2                       | 6.453     | 1.56 | 0.00002 |
| 1451190_a_at | BC025837  | Sbk1          | SH3-binding kinase 1                                                      | 5.610     | 1.70 | 0.00003 |
| 1449833_at   | NM_011472 | Sprr2f        | small proline-rich protein 2F                                             | 5.350     | 1.96 | 0.00003 |
| 1420437_at   | NM_008324 | Indo          | indoleamine-pyrrole 2,3 dioxygenase                                       | 4.815     | 1.57 | 0.00003 |
| 1428228_at   | AK013402  | Pgm3          | phosphoglucomutase 3                                                      | 4.813     | 1.46 | 0.00003 |
| 1436605_at   | BB022982  | Tkt           | transketolase                                                             | 4.762     | 1.62 | 0.00003 |
| 1446074_at   | BB667876  | Mosc1         | MOCO sulphurase C-terminal domain containing 1                            | 4.553     | 1.39 | 0.00004 |
| 1440838_at   | BQ126997  | AI852064      | expressed sequence AI852064                                               | 4.516     | 1.32 | 0.00004 |
| 1455342_at   | BM232966  | A230083H22Rik | RIKEN cDNA A230083H22 gene                                                | 4.320     | 1.41 | 0.00005 |
| 1427481_a_at | BC027114  | Atp1a3        | ATPase, Na <sup>+</sup> /K <sup>+</sup> transporting, alpha 3 polypeptide | 4.277     | 1.74 | 0.00005 |
| 1447606_x_at | AV047063  | Aqp11         | aquaporin 11                                                              | 4.234     | 1.42 | 0.00005 |
| 1457928_at   | AV280630  | 4930435E12Rik | RIKEN cDNA 4930435E12 gene                                                | 4.169     | 1.27 | 0.00006 |
| 1421262_at   | BC020991  | Lipg          | lipase, endothelial                                                       | 4.084     | 1.38 | 0.00007 |
| 1448424_at   | U91905    | Frzb          | frizzled-related protein                                                  | 4.069     | 1.52 | 0.00007 |
| 1457033_at   | BM198753  | BQ559217      | expressed sequence BQ559217                                               | 3.941     | 1.32 | 0.00008 |
| 1444091_a_at | BB048100  | 6430571L13Rik | RIKEN cDNA 6430571L13 gene                                                | 3.846     | 1.34 | 0.00010 |
| 1415822_at   | BG060909  | Scd1          | stearoyl-Coenzyme A desaturase 1                                          | 3.840     | 1.45 | 0.00010 |
| 1455099_at   | BB414982  | Mogat2        | monoacylglycerol O-acyltransferase 2                                      | 3.622     | 1.33 | 0.00016 |
| 1439016_x_at | AV371678  | Sprr2a        | small proline-rich protein 2A                                             | 3.601     | 1.26 | 0.00017 |
| 1436630_at   | AI550443  | Aqp11         | aquaporin 11                                                              | 3.571     | 1.34 | 0.00018 |
| 1419185_a_at | AF245479  | Mlxipl        | MLX interacting protein-like                                              | 3.524     | 1.53 | 0.00020 |
| 1423978_at   | BC025837  | Sbk1          | SH3-binding kinase 1                                                      | 3.518     | 1.60 | 0.00021 |
| 1418395_at   | NM_026183 | 1300013J15Rik | RIKEN cDNA 1300013J15 gene                                                | 3.421     | 1.35 | 0.00025 |
| 1428005_at   | AA958845  | Mosc1         | MOCO sulphurase C-terminal domain containing 1                            | 3.404     | 1.92 | 0.00026 |
| 1448619_at   | NM_007856 | Dhcr7         | 7-dehydrocholesterol reductase                                            | 3.337     | 1.37 | 0.00031 |
| 1443017_at   | BB235708  | Cpeb2         | cytoplasmic polyadenylation element binding protein 2                     | 3.308     | 1.36 | 0.00032 |
| 1457141_at   | BB229969  | Aqp11         | aquaporin 11                                                              | 3.283     | 1.89 | 0.00034 |
| 1443997_at   | BB387595  | Gprin2        | G protein regulated inducer of neurite outgrowth 2                        | 3.199     | 1.31 | 0.00042 |
| 1446542_at   | AW553564  | Gss           | glutathione synthetase                                                    | 3.166     | 1.59 | 0.00045 |
| 1434188_at   | AV220703  | Slc16a12      | solute carrier family 16 (monocarboxylic acid transporters), member 12    | 3.134     | 1.30 | 0.00047 |
| 1420013_s_at | C77434    | Lss           | lanosterol synthase                                                       | 3.100     | 1.30 | 0.00051 |
| 1446315_at   | BB261367  | Acly          | ATP citrate lyase                                                         | 3.088     | 1.39 | 0.00052 |
| 1436702_at   | BE989731  | Nat8l         | N-acetyltransferase 8-like                                                | 3.079     | 1.69 | 0.00053 |
| 1450188_s_at | BC020991  | Lipg          | lipase, endothelial                                                       | 3.068     | 1.50 | 0.00055 |
| 1416639_at   | NM_019741 | Slc2a5        | solute carrier family 2 (facilitated glucose transporter), member 5       | 3.042     | 1.35 | 0.00059 |
| 1453552_at   | AK009336  | 2310014F07Rik | RIKEN cDNA 2310014F07 gene                                                | 3.042     | 1.30 | 0.00059 |
| 1448318_at   | NM_007408 | Adfp          | adipose differentiation related protein                                   | 3.036     | 1.28 | 0.00060 |
| 1429463_at   | BB612385  | Prkaa2        | protein kinase, AMP-activated, alpha 2 catalytic subunit                  | 3.020     | 1.31 | 0.00063 |

|              |           |               |                                                                          |       |      |         |
|--------------|-----------|---------------|--------------------------------------------------------------------------|-------|------|---------|
| 1422612_at   | NM_013820 | Hk2           | hexokinase 2                                                             | 3.013 | 1.39 | 0.00064 |
| 1456241_a_at | BB315716  | 1810073N04Rik | RIKEN cDNA 1810073N04 gene                                               | 2.990 | 1.28 | 0.00068 |
| 1423179_at   | BB324482  | Kcnb1         | potassium voltage gated channel, Shab-related subfamily, member 1        | 2.988 | 1.53 | 0.00068 |
| 1438627_x_at | BB095413  | Pgd           | phosphogluconate dehydrogenase                                           | 2.985 | 1.44 | 0.00069 |
| 1459689_at   | BE331869  | Gpd2          | glycerol phosphate dehydrogenase 2, mitochondrial                        | 2.948 | 1.29 | 0.00076 |
| 1429267_at   | AW060409  | Acot11        | acyl-CoA thioesterase 11                                                 | 2.948 | 1.29 | 0.00076 |
| 1457460_at   | BB011474  | Acss2         | acyl-CoA synthetase short-chain family member 2                          | 2.944 | 1.53 | 0.00076 |
| 1418311_at   | NM_022014 | Fn3k          | fructosamine 3 kinase                                                    | 2.941 | 1.38 | 0.00078 |
| 1418936_at   | BC022952  | Maff          | v-maf musculoaponeurotic fibrosarcoma oncogene family, protein F (avian) | 2.940 | 1.46 | 0.00078 |
| 1418760_at   | AB030503  | Rdh11         | retinol dehydrogenase 11                                                 | 2.923 | 1.47 | 0.00081 |
| 1423180_at   | BB324482  | Kcnb1         | potassium voltage gated channel, Shab-related subfamily, member 1        | 2.880 | 1.27 | 0.00091 |
| 1434679_at   | BM945195  | Ncan          | neurocan                                                                 | 2.843 | 1.45 | 0.00100 |
| 1436729_at   | AV328634  | 2600003E23Rik | RIKEN cDNA 2600003E23 gene                                               | 2.841 | 1.29 | 0.00100 |
| 1444810_at   | BG065305  | Acaca         | acetyl-Coenzyme A carboxylase alpha                                      | 2.841 | 1.56 | 0.00100 |
| 1452741_s_at | BQ175968  | Gpd2          | glycerol phosphate dehydrogenase 2, mitochondrial                        | 2.822 | 1.29 | 0.00106 |
| 1458680_at   | AV291985  | Heph11        | hephaestin-like 1                                                        | 2.796 | 1.43 | 0.00115 |
| 1456495_s_at | BG070848  | Osbp16        | oxysterol binding protein-like 6                                         | 2.779 | 1.26 | 0.00120 |
| 1426811_at   | BB080065  | Ppp2r5b       | protein phosphatase 2, regulatory subunit B (B56), beta isoform          | 2.764 | 1.29 | 0.00127 |
| 1434272_at   | AV231491  | Cpeb2         | cytoplasmic polyadenylation element binding protein 2                    | 2.762 | 1.38 | 0.00128 |
| 1433182_at   | AK015278  | 4930431N21Rik | RIKEN cDNA 4930431N21 gene                                               | 2.738 | 1.30 | 0.00136 |
| 1417067_s_at | AK014605  | Cabc1         | chaperone, ABC1 activity of bc1 complex like (S. pombe)                  | 2.703 | 1.31 | 0.00149 |
| 1436771_x_at | BB314208  | Pgd           | phosphogluconate dehydrogenase                                           | 2.702 | 1.48 | 0.00149 |
| 1437380_x_at | BB558114  | Pgd           | phosphogluconate dehydrogenase                                           | 2.695 | 1.48 | 0.00153 |
| 1458099_at   | BB291417  | EST           | EST                                                                      | 2.692 | 1.46 | 0.00154 |
| 1423437_at   | AI172943  | Gsta3         | glutathione S-transferase, alpha 3                                       | 2.678 | 1.41 | 0.00160 |
| 1452345_at   | AF237628  | Lmod2         | leiomodoin 2 (cardiac)                                                   | 2.676 | 1.43 | 0.00161 |
| 1448663_s_at | NM_138656 | Mvd           | mevalonate (diphospho) decarboxylase                                     | 2.637 | 1.29 | 0.00180 |
| 1442656_at   | BG066936  | Elov16        | ELOVL family member 6, elongation of long chain fatty acids (yeast)      | 2.637 | 1.48 | 0.00181 |
| 1449563_at   | NM_007727 | Cntn1         | contactin 1                                                              | 2.633 | 1.34 | 0.00182 |
| 1441581_at   | AV233423  | Asb10         | ankyrin repeat and SOCS box-containing protein 10                        | 2.632 | 1.27 | 0.00183 |

**Supplemental Table 3:**

Downregulated murine mammary gland genes with shared human orthologues that are also downregulated in response to GR activation (n = 54)

| Mouse Probe  | Accession | Gene symbol   | Gene name                                                                          | Human Orthologous Probe |
|--------------|-----------|---------------|------------------------------------------------------------------------------------|-------------------------|
| 1449109_at   | NM_007706 | Socs2         | suppressor of cytokine signaling 2                                                 | 203373_at               |
| 1426978_at   | AW682368  | Klhl2         | kelch-like 2, Mayven (Drosophila)                                                  | 219157_at               |
| 1428774_at   | AK020118  | Gpc6          | glypican 6                                                                         | 227059_at               |
| 1422527_at   | NM_010386 | H2-DMA        | histocompatibility 2, class II, locus DMA                                          | 217478_s_at             |
| 1420703_at   | BM941868  | Csf2ra        | colony stimulating factor 2 receptor, alpha, low-affinity (granulocyte-macrophage) | 211287_x_at             |
| 1415973_at   | AW546141  | Marcks        | myristoylated alanine rich protein kinase C substrate                              | 213002_at               |
| 1448406_at   | BC010712  | Eid1          | EP300 interacting inhibitor of differentiation 1                                   | 211698_at               |
| 1458351_s_at | BB428573  | Klhl2         | kelch-like 2, Mayven (Drosophila)                                                  | 219157_at               |
| 1437939_s_at | BM237633  | Ctsc          | cathepsin C                                                                        | 231234_at               |
| 1418454_at   | NM_015776 | Mfap5         | microfibrillar associated protein 5                                                | 209758_s_at             |
| 1435518_at   | BM246972  | Rap1b         | RAS related protein 1b                                                             | 200833_s_at             |
| 1418507_s_at | NM_007706 | Socs2         | suppressor of cytokine signaling 2                                                 | 203373_at               |
| 1417111_at   | BB070019  | Man1a         | mannosidase 1, alpha                                                               | 221760_at               |
| 1456700_x_at | BB100920  | Marcks        | myristoylated alanine rich protein kinase C substrate                              | 213002_at               |
| 1419280_at   | AK012196  | Pip5k2a       | phosphatidylinositol-4-phosphate 5-kinase, type II, alpha                          | 205570_at               |
| 1456676_a_at | AV282911  | Pfkfb3        | 6-phosphofructo-2-kinase/fructose-2,6-biphosphatase 3                              | 202464_s_at             |
| 1451527_at   | AF352788  | Pcolce2       | procollagen C-endopeptidase enhancer 2                                             | 219295_s_at             |
| 1424099_at   | BC019664  | 2310016C16Rik | RIKEN cDNA 2310016C16 gene                                                         | 228141_at               |
| 1426708_at   | BC003908  | Antxr2        | anthrax toxin receptor 2                                                           | 155536_at               |
| 1420731_a_at | NM_007792 | Csrp2         | cysteine and glycine-rich protein 2                                                | 211126_s_at             |
| 1449262_s_at | BB704337  | Lin7c         | lin-7 homolog C (C. elegans)                                                       | 223350_x_at             |
| 1429775_a_at | AK009736  | Gpr137b       | G protein-coupled receptor 137B                                                    | 204137_at               |
| 1450231_a_at | BF137345  | Birc4         | baculoviral IAP repeat-containing 4                                                | 243026_x_at             |
| 1421321_a_at | NM_019671 | Net1          | neuroepithelial cell transforming gene 1                                           | 201830_s_at             |
| 1450084_s_at | NM_054102 | Ivns1abp      | influenza virus NS1A binding protein                                               | 244235_at               |
| 1416111_at   | NM_009856 | Cd83          | CD83 antigen                                                                       | 204440_at               |
| 1424524_at   | BC021433  | 1200002N14Rik | RIKEN cDNA 1200002N14 gene                                                         | 241992_at               |
| 1421394_a_at | BF137345  | Birc4         | baculoviral IAP repeat-containing 4                                                | 243026_x_at             |
| 1417009_at   | NM_023143 | C1r           | complement component 1, r subcomponent                                             | 212067_s_at             |
| 1420011_s_at | C77390    | Xbp1          | X-box binding protein 1                                                            | 200670_at               |
| 1419279_at   | AK012196  | Pip5k2a       | phosphatidylinositol-4-phosphate 5-kinase, type II, alpha                          | 205570_at               |
| 1448525_a_at | AK018668  | Bnip3l        | BCL2/adenovirus E1B interacting protein 3-like                                     | 221479_s_at             |
| 1419368_a_at | NM_019706 | Rnf138        | ring finger protein 138                                                            | 239143_x_at             |
| 1416868_at   | BC027026  | Cdkn2c        | cyclin-dependent kinase inhibitor 2C (p18, inhibits CDK4)                          | 211792_s_at             |
| 1450241_a_at | NM_010161 | Evi2a         | ecotropic viral integration site 2a                                                | 204774_at               |
| 1437417_s_at | BB493031  | Gpc6          | glypican 6                                                                         | 227059_at               |
| 1435519_at   | BM246972  | Rap1b         | RAS related protein 1b                                                             | 200833_s_at             |

|              |           |               |                                                                        |              |
|--------------|-----------|---------------|------------------------------------------------------------------------|--------------|
| 1449670_x_at | AW546472  | Gpr137b       | G protein-coupled receptor 137B                                        | 204137_at    |
| 1426604_at   | BF714880  | Rnasel        | ribonuclease L (2', 5'-oligoadenylate synthetase-dependent)            | 229285_at    |
| 1422978_at   | NM_007807 | Cybb          | cytochrome b-245, beta polypeptide                                     | 233538_s_at  |
| 1424927_at   | BC025083  | Glpr1         | GLI pathogenesis-related 1 (glioma)                                    | 226142_at    |
| 1449928_at   | NM_025975 | Dynlt3        | dynein light chain Tctex-type 3                                        | 203303_at    |
| 1449580_s_at | NM_010388 | H2-DMb2       | histocompatibility 2, class II, locus Mb2                              | 203932_at    |
| 1447909_s_at | AW122690  | 6720457D02Rik | RIKEN cDNA 6720457D02 gene                                             | 223070_at    |
| 1427471_at   | BF782863  | Fbxl3         | F-box and leucine-rich repeat protein 3                                | 242829_x_at  |
| 1417239_at   | BC002162  | Cetn3         | centrin 3                                                              | 209662_at    |
| 1448136_at   | BC003264  | Enpp2         | ectonucleotide pyrophosphatase/phosphodiesterase 2                     | 210839_s_at  |
| 1450417_a_at | BG070206  | Rps20         | ribosomal protein S20                                                  | 200949_x_at  |
| 1437064_at   | AV232123  | Ar            | androgen receptor                                                      | 211621_at    |
| 1420867_at   | BB609648  | Tmed2         | transmembrane emp24 domain trafficking protein 2                       | 204427_s_at  |
| 1419073_at   | NM_019790 | Tmeff2        | transmembrane protein with EGF-like and two follistatin-like domains 2 | 224321_at    |
| 1449404_at   | AK012196  | Pip5k2a       | phosphatidylinositol-4-phosphate 5-kinase, type II, alpha              | 205570_at    |
| 1426649_at   | BM114154  | Tmeff1        | transmembrane protein with EGF-like and two follistatin-like domains 1 | 1555841_at   |
| 1449265_at   | BC008152  | Casp1         | caspace 1                                                              | 1552703_s_at |

**Supplemental Table 4:**

Upregulated murine mammary gland genes with shared human orthologues that are also upregulated in response to GR activation

| Mouse Probe  | Accession | Gene symbol   | Gene name                                                                | Human Orthologous Probe |
|--------------|-----------|---------------|--------------------------------------------------------------------------|-------------------------|
| 1443017_at   | BB235708  | Cpeb2         | cytoplasmic polyadenylation element binding protein 2                    | 235462_at               |
| 1446542_at   | AW553564  | Gss           | glutathione synthetase                                                   | 234312_s_at             |
| 1420013_s_at | C77434    | Lss           | lanosterol synthase                                                      | 211019_s_at             |
| 1446315_at   | BB261367  | Acly          | ATP citrate lyase                                                        | 210337_s_at             |
| 1457460_at   | BB011474  | Acss2         | acyl-CoA synthetase short-chain family member 2                          | 234312_s_at             |
| 1418936_at   | BC022952  | Maff          | v-maf musculoaponeurotic fibrosarcoma oncogene family, protein F (avian) | 205193_at               |
| 1436729_at   | AV328634  | 2600003E23Rik | RIKEN cDNA 2600003E23 gene                                               | 203563_at               |
| 1456495_s_at | BG070848  | Osbp16        | oxysterol binding protein-like 6                                         | 223805_at               |
| 1434272_at   | AV231491  | Cpeb2         | cytoplasmic polyadenylation element binding protein 2                    | 235462_at               |
| 1448663_s_at | NM_138656 | Mvd           | mevalonate (diphospho) decarboxylase                                     | 203027_s_at             |

**Supplemental Table 5:**

Downregulated mammary gland genes in isolated mice at 20 weeks as identified using RMA (n = 6)

| Probe set    | Accession | Gene symbol | Gene name              | SAM score | FC   | pval    |
|--------------|-----------|-------------|------------------------|-----------|------|---------|
| 1420369_a_at | NM_009972 | Csn2        | casein beta            | -10.209   | 0.05 | 0.00004 |
| 1420627_a_at | NM_007784 | Csn1s1      | casein alpha s1        | -9.529    | 0.52 | 0.00005 |
| 1420370_s_at | NM_009972 | Csn2        | casein beta            | -8.902    | 0.25 | 0.00005 |
| 1431693_a_at | AK003506  | Il17b       | interleukin 17B        | -7.627    | 0.76 | 0.00011 |
| 1436170_a_at | BF119305  | Csn1s2a     | casein alpha s2-like A | -6.450    | 0.14 | 0.00028 |
| 1427482_a_at | X61397    | Car8        | carbonic anhydrase 8   | -6.068    | 0.68 | 0.00037 |

**Supplemental Table 6:**

Upregulated mammary gland genes in isolated mice at 20 weeks as identified using RMA (n = 18)

| Probe set    | Accession | Gene symbol | Gene name                                                       | SAM score | FC   | pval    |
|--------------|-----------|-------------|-----------------------------------------------------------------|-----------|------|---------|
| 1452181_at   | BB312117  | Ckap4       | cytoskeleton-associated protein 4                               | 9.194     | 1.28 | 0.00005 |
| 1449169_at   | NM_008216 | Has2        | hyaluronan synthase 2                                           | 8.351     | 1.85 | 0.00007 |
| 1455019_x_at | BB818012  | Ckap4       | cytoskeleton-associated protein 4                               | 7.764     | 1.41 | 0.00010 |
| 1421172_at   | NM_007400 | Adam12      | a disintegrin and metallopeptidase domain 12<br>(meltrin alpha) | 7.050     | 1.42 | 0.00017 |
| 1460227_at   | BC008107  | Timp1       | tissue inhibitor of metalloproteinase 1                         | 6.836     | 1.68 | 0.00020 |
| 1451775_s_at | S80963    | Il13ra1     | interleukin 13 receptor, alpha 1                                | 6.755     | 1.31 | 0.00021 |
| 1449454_at   | AI647987  | Bst1        | bone marrow stromal cell antigen 1                              | 6.308     | 2.16 | 0.00030 |
| 1419703_at   | NM_016919 | Col5a3      | procollagen, type V, alpha 3                                    | 6.164     | 1.53 | 0.00034 |
| 1449453_at   | AI647987  | Bst1        | bone marrow stromal cell antigen 1                              | 6.115     | 1.90 | 0.00035 |
| 1426754_x_at | BB312117  | Ckap4       | cytoskeleton-associated protein 4                               | 6.050     | 1.34 | 0.00038 |
| 1437811_x_at | AV312368  |             |                                                                 | 5.980     | 1.52 | 0.00040 |
| 1460188_at   | NM_013545 | Ptpn6       | protein tyrosine phosphatase, non-receptor type<br>6            | 5.792     | 1.29 | 0.00049 |
| 1417730_at   | NM_010162 | Ext1        | exostoses (multiple) 1                                          | 5.774     | 1.40 | 0.00050 |
| 1450871_a_at | X17502    | Bcat1       | branched chain aminotransferase 1, cytosolic                    | 5.597     | 1.41 | 0.00060 |
| 1416165_at   | NM_133685 | Rab31       | RAB31, member RAS oncogene family                               | 5.540     | 1.30 | 0.00063 |
| 1415951_at   | NM_010221 | Fkbp10      | FK506 binding protein 10                                        | 5.482     | 1.45 | 0.00067 |
| 1415857_at   | BG064842  | Emb         | embigin                                                         | 5.216     | 1.54 | 0.00087 |
| 1421171_at   | NM_007400 | Adam12      | a disintegrin and metallopeptidase domain 12<br>(meltrin alpha) | 5.123     | 1.42 | 0.00095 |
