# Supplementary material
Source: PubMed Central journal article supplement (PMC4707045)

# Individual and Averaged Tumor Burden Over Time

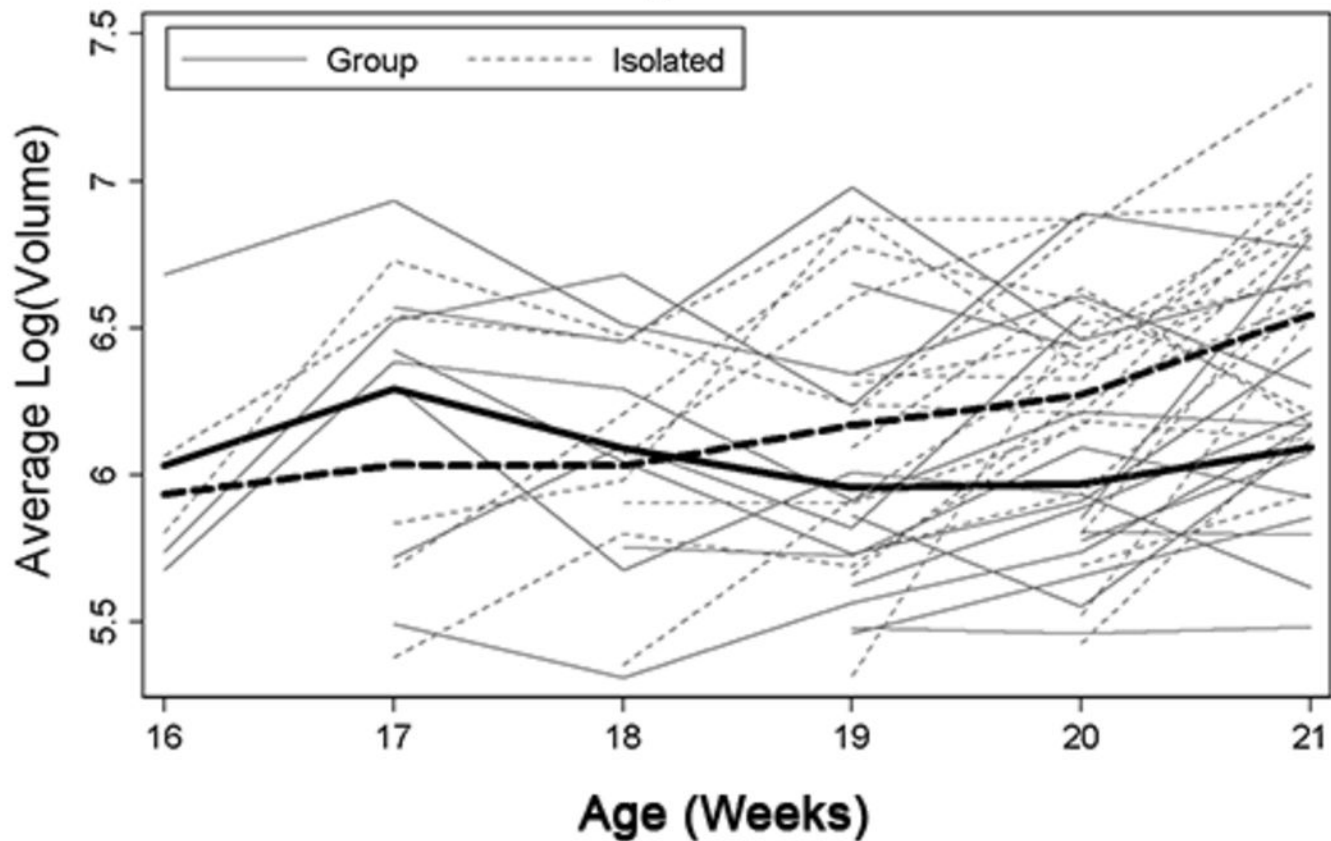

Supplement: NIHMS733068-supplement-Suppl_Figure_1.pdf [file NIHMS733068-supplement-Suppl_Figure_1.pdf]

Normal

MIN

INVASIVE

ER

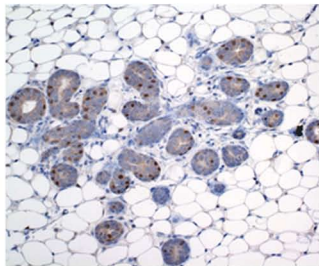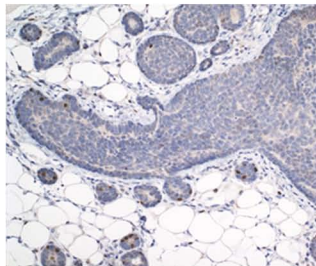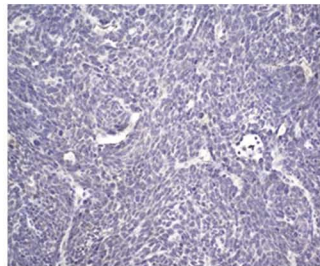

PR

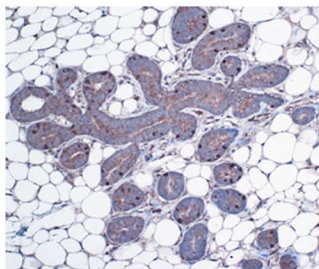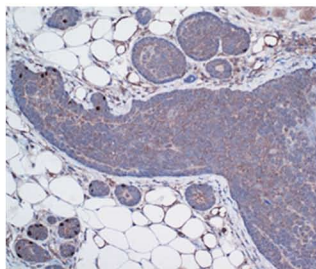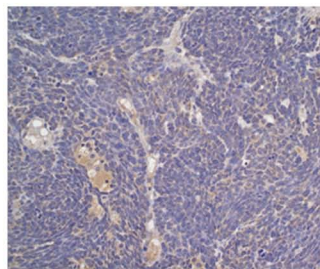

GR

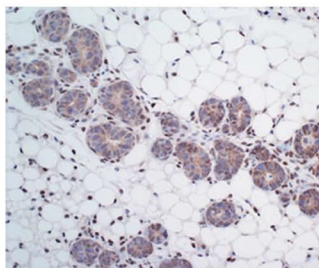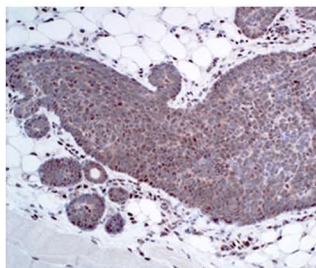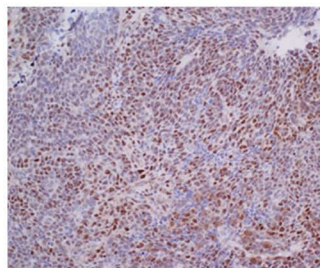

Supplement: NIHMS733068-supplement-Suppl_Figure_2.pdf [file NIHMS733068-supplement-Suppl_Figure_2.pdf]
